# Supplementary material for: Rhododendron and Japanese Knotweed: invasive species as innovative crops for second generation biofuels for the ionoSolv process
Source: Royal Society of Chemistry journal article supplement (doi:10.1039/d1ra01943k), 2021-01-01
Supplement: d1ra01943k1.pdf [file d1ra01943k1.pdf]

## Supplementary information

### Rhododendron and Japanese Knotweed: invasive species as innovative crops for second generation biofuels for the ianoSolv process

Louis M. Hennequin<sup>1</sup>, Karen Polizzi<sup>1</sup>, Paul S. Fennell<sup>1</sup>, Jason P. Hallett<sup>1</sup>

<sup>1</sup>Department of Chemical Engineering, Imperial College London, Exhibition Road, London, UK, SW7 2AZ

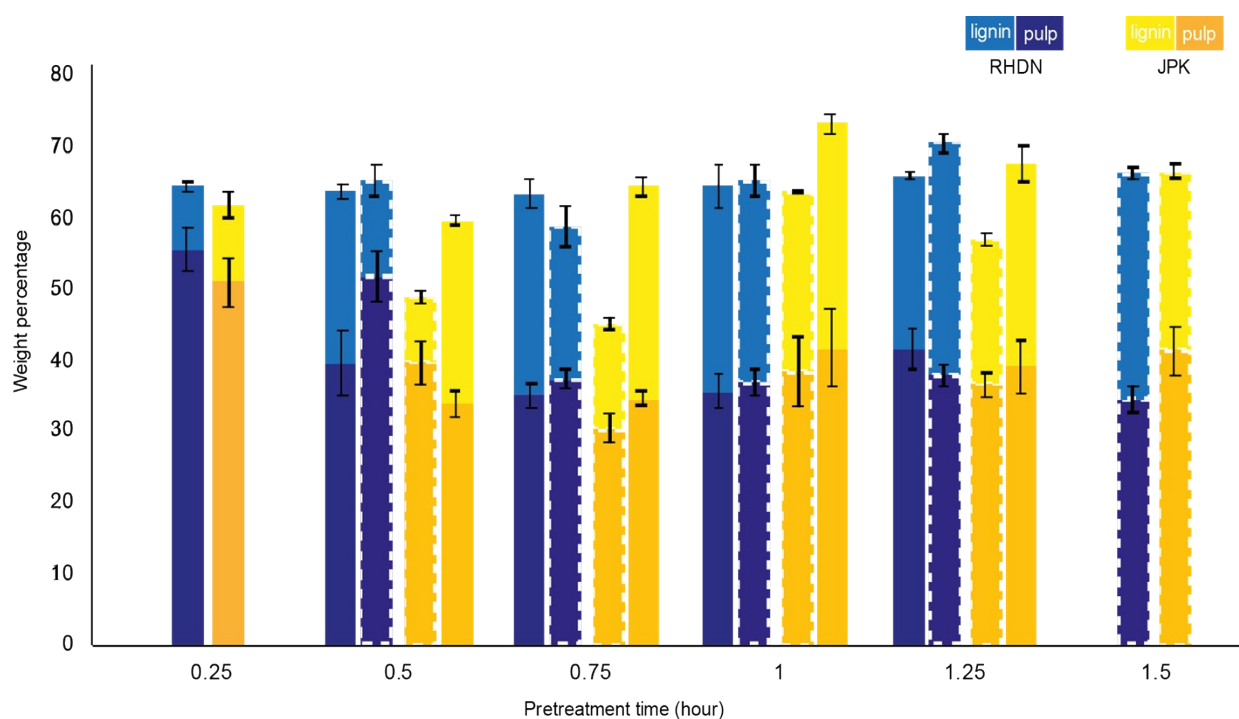

Figure S1 Pulp and lignin yields from the time course pretreatments of JPK and RHDN using DMBA HSO<sub>4</sub> (20%wt water) at 20 wt % biomass:IL loading. Dashed bars indicate pretreatment at 150°C, solid bars at 170°C.

| Sample   | RHDN - 150°C   |                |      | RHDN - 170°C   |                |      |
|----------|----------------|----------------|------|----------------|----------------|------|
| Time (h) | M <sub>n</sub> | M <sub>w</sub> | Đ    | M <sub>n</sub> | M <sub>w</sub> | Đ    |
| 0.5      | 1436           | 6824           | 4.97 | 1291           | 6321           | 5.10 |
| 0.75     | 1311           | 7204           | 5.14 | 1201           | 6666           | 5.56 |
| 1        | 1187           | 7386           | 6.02 | 1166           | 6226           | 5.36 |
| 1.25     | 1113           | 7798           | 6.83 | 1131           | 6287           | 5.56 |

A.

| Sample   | JPK - 150°C    |                |      | JPK - 170°C    |                |      |
|----------|----------------|----------------|------|----------------|----------------|------|
| Time (h) | M <sub>n</sub> | M <sub>w</sub> | Đ    | M <sub>n</sub> | M <sub>w</sub> | Đ    |
| 0.5      | 1218           | 4544           | 3.59 | 842            | 4067           | 4.95 |
| 0.75     | 1050           | 4063           | 3.96 | 824            | 4322           | 5.48 |
| 1        | 1064           | 5040           | 4.67 | 990            | 5484           | 5.68 |
| 1.25     | 1077           | 4063           | 4.12 | 857            | 5332           | 5.96 |

B.

C.

Figure S2. **A.** GPC results of the lignin. M<sub>n</sub> and M<sub>w</sub> (Da) for pretreatment of RHDN **B.** GPC results of the lignin. M<sub>n</sub> and M<sub>w</sub> (Da) for pretreatment of JPK **C.** Higher Heating Values of the lignin obtained after pretreatment using the Demirbas formula (MJ.kg<sup>-1</sup>)

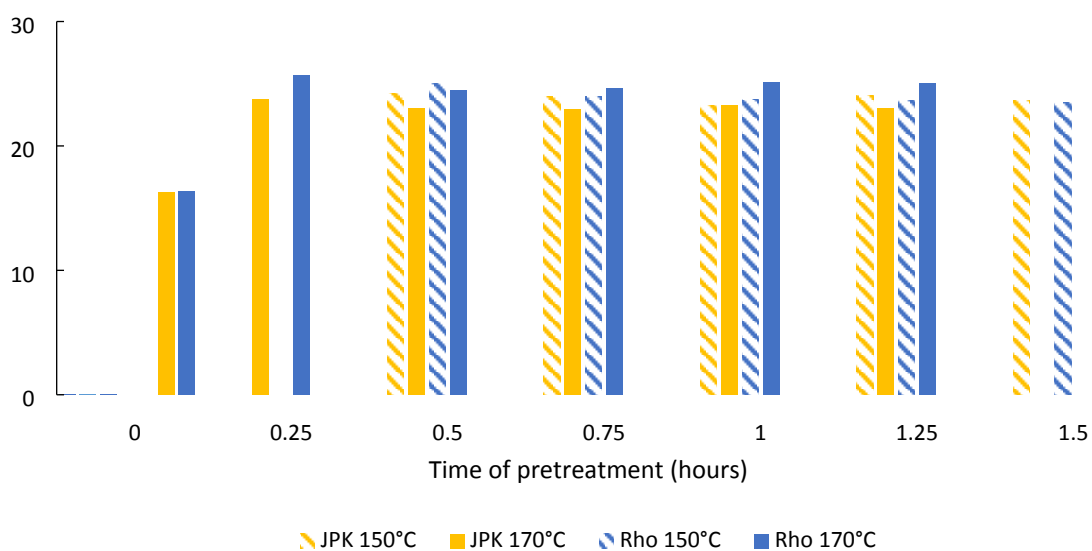

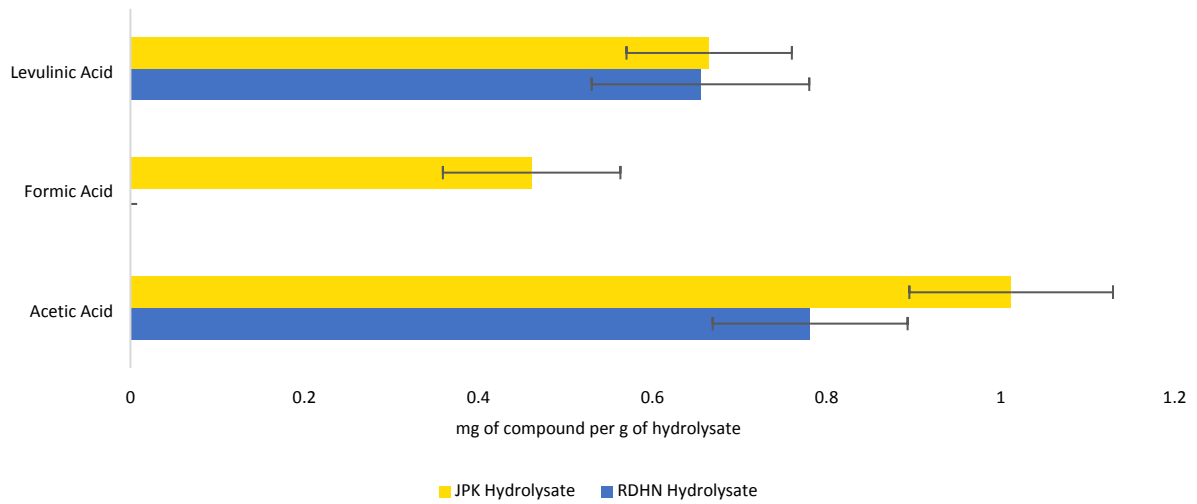

Figure S3 HPLC analysis of the weak acids found in the fermentate for JPK and RDHN

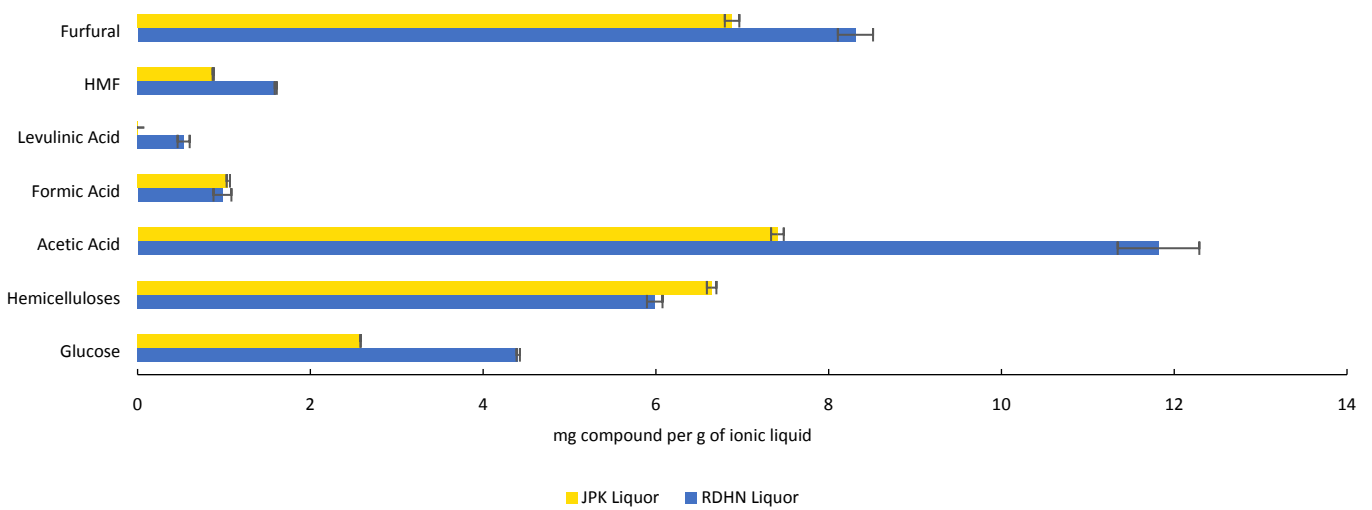

Figure S4 Analysis of the compounds found in the ionic liquid liquor after pretreatment

| COST and VALUE<br>(£ per ton of wood) |             | COST INPUTS                                           |                    | VALUE INPUTS                  |                          | CAPITAL INPUTS                                 |                   |                    |                      |
|---------------------------------------|-------------|-------------------------------------------------------|--------------------|-------------------------------|--------------------------|------------------------------------------------|-------------------|--------------------|----------------------|
| <u>Virgin biomass</u>                 |             | <u>Solvent</u>                                        |                    | <u>Pulp</u>                   |                          | <u>Invasive species (RHDN)</u>                 |                   | <u>Virgin wood</u> |                      |
| Pulp                                  | £72         | Price of IL                                           | 1.24 \$/kg         | Market price                  | 160 £/ton pulp           | Plant size                                     | 1,000,000         | 771,000            | ton/year             |
| Lignin                                | £33         | Water loading                                         | 0.82 £/kg          | Yield                         | 0.45 ton pulp/ton wood   |                                                | 3030.30           | 2336.36            | ton/day              |
| Furfural                              | £40         | Biomass loading                                       | 0.2 wt/wt fraction | Revenue                       | 72 £/ton wood            | Operation                                      | 330               |                    | days/year            |
| Acetic acid                           | £23         | IL purge rate Virgin                                  | 0.005 wt/wt        | <u>Lignin</u>                 |                          | Lifetime/depreciation                          | 10                |                    | years                |
| <b>REVENUE</b>                        | <b>£168</b> | <u>Virgin Biomass</u>                                 |                    | Market price                  | 132 £/ton lignin         | Tax rate                                       | 0.2 £/£           |                    |                      |
| Solvent                               | £16         | Gate fee dedicated bioenergy crop without any subsidy | 60 £/ton           | Yield                         | 0.25 ton lignin/ton wood | Interest rate                                  | 0.13 £/£          |                    |                      |
| Biomass                               | £60         | <u>Water</u>                                          |                    | Revenue                       | 33 £/ton wood            | Exchange rate                                  | 1.5 \$/£          |                    |                      |
| Water                                 | £4          | Cost                                                  | 4 £/ton wood       | <u>Furfural</u>               |                          | <u>Capital cost estimates</u>                  |                   |                    |                      |
| Capital                               | £13         | Heat                                                  | 50.8 £/ton wood    | Market price                  | 1000 £/ton FF            | 1. Estimate for Innovations                    |                   |                    |                      |
| Energy                                | £51         | <u>Energy</u>                                         |                    | Yield                         | 0.04 ton FF/ton wood     | Cost of pilot plant (1 t/day)                  | 250,000           |                    | £                    |
| <b>COST</b>                           | <b>£145</b> |                                                       |                    | Revenue                       | 40 £/ton wood            |                                                | 68,388,055        | 57,005,704         | £                    |
| <b>NET</b>                            | <b>£23</b>  | <u>Acetic acid</u>                                    |                    | <u>Acetic acid</u>            |                          | Scaled capital cost                            | 9                 | 10                 | £/ton wood           |
| <b>GROSS MARGIN</b>                   | <b>14%</b>  | Market price                                          | 460 £/tonne        | yield                         | 0.05 ton FF/ton wood     |                                                | 26,941            | 22,457             | £/day                |
|                                       |             | Revenue                                               | 23 £/ton wood      | <u>Capital cost estimates</u> |                          | 2. Estimate with different feedstocks          |                   |                    |                      |
|                                       |             | <u>If cost of biomass if £60 / ton</u>                |                    |                               |                          | in £                                           | Wheat straw plant | Invasive species   | Virgin wood          |
| Pulp                                  | £72         | Pulp                                                  | £72                |                               |                          | Size                                           | (scaled)          | plants (scaled)    | plant (scaled)       |
| Lignin                                | £33         | Lignin                                                | £33                |                               |                          | Estimated process cost (no heat integration)   | 771,309           | 1,000,000          | 771,000 ton          |
| Furfural                              | £40         | Furfural                                              | £40                |                               |                          | Estimated process cost (with heat integration) | 19,278,959        | 23,121,910         | 19,273,553 £         |
| Acetic acid                           | £23         | Acetic acid                                           | £23                |                               |                          | Estimated process cost (with heat integration) | 67,767,925        | 81,276,372         | 67,748,920 £         |
| <b>REVENUE</b>                        | <b>£168</b> | <b>REVENUE</b>                                        | <b>£168</b>        |                               |                          | <b>Total capital cost (no HI)</b>              | 79,043,733        | <b>94,799,832</b>  | <b>79,021,566</b> £  |
| Solvent                               | £16         | Solvent                                               | £16                |                               |                          | Total capital cost (with HI)                   | 277,848,494       | 333,233,127        | 277,770,572 £        |
| Biomass                               | £60         | Biomass                                               | £60                |                               |                          | <b>Scaled capital cost (no HI)</b>             | <b>10</b>         | <b>12</b>          | <b>13</b> £/ton wood |
| Water                                 | £4          | Water                                                 | £4                 |                               |                          |                                                |                   |                    |                      |
| Capital                               | £13         | Capital                                               | £13                |                               |                          |                                                |                   |                    |                      |
| Energy                                | £51         | Energy                                                | £51                |                               |                          |                                                |                   |                    |                      |
| <b>COST</b>                           | <b>£145</b> | <b>COST</b>                                           | <b>£145</b>        |                               |                          |                                                |                   |                    |                      |
| <b>NET</b>                            | <b>£ 23</b> | <b>NET</b>                                            | <b>£ 23</b>        |                               |                          |                                                |                   |                    |                      |
| <b>GROSS MARGIN</b>                   | <b>14%</b>  | <b>GROSS MARGIN</b>                                   | <b>14%</b>         |                               |                          |                                                |                   |                    |                      |

Table S5 Details of the techno-economic assessment of the IonoSolv process, adapted for the studied invasive species. Gate fee here fixed at £60 (dedicated bioenergy crop) for comparison.
